# Supplementary material for: Identification and validation of anoikis-related lncRNAs for prognostic significance and immune microenvironment characterization in ovarian cancer
Source: publisher site journal article supplement (doi:10.18632/aging.205439), 2024-01-15
Supplement: Supplementary file [file aging-v16i2-205439-supplementary-material-SD1.pdf]

## SUPPLEMENTARY FIGURES

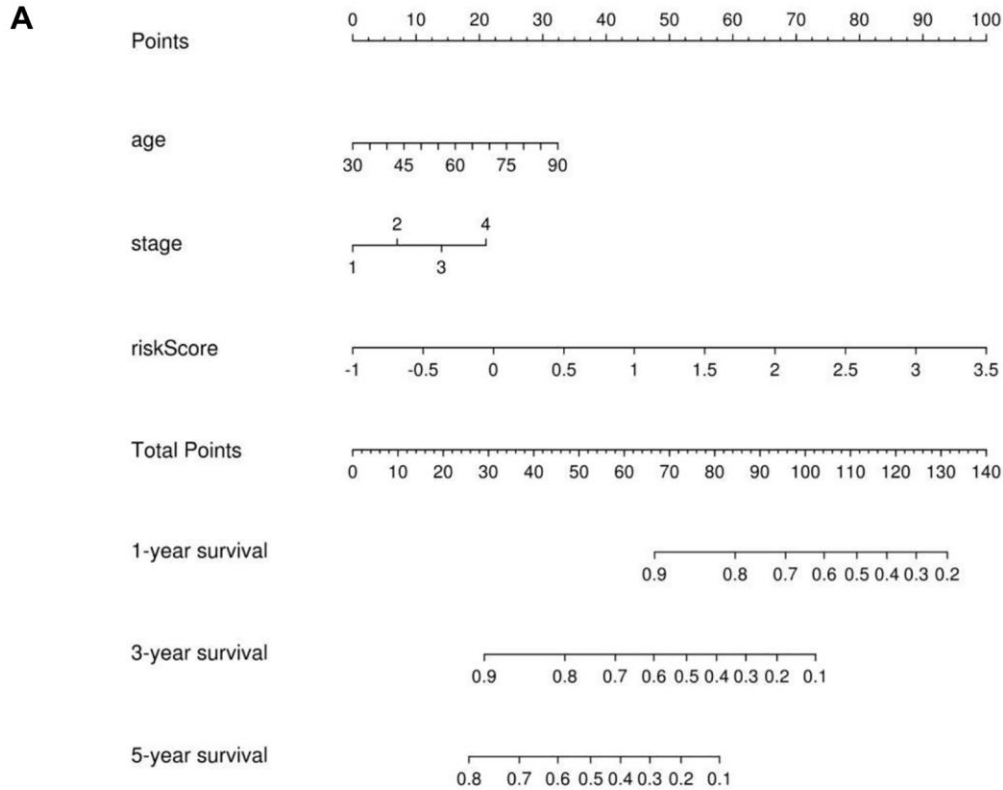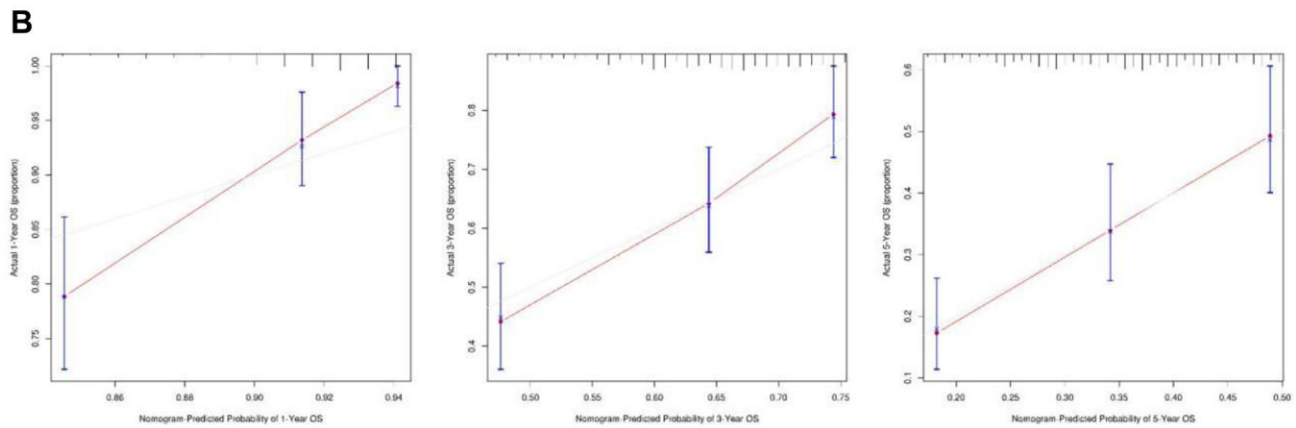

**Supplementary Figure 1. Construction of nomogram and validation its predictive value.** (A) Nomogram was constructed to predict the 1-year, 3-year, and 5-year overall survival of ovarian cancer patients. (B) Calibration curves were generated to assess the predictive accuracy of the nomogram for the 1-year, 3-year, and 5-year overall survival rates.

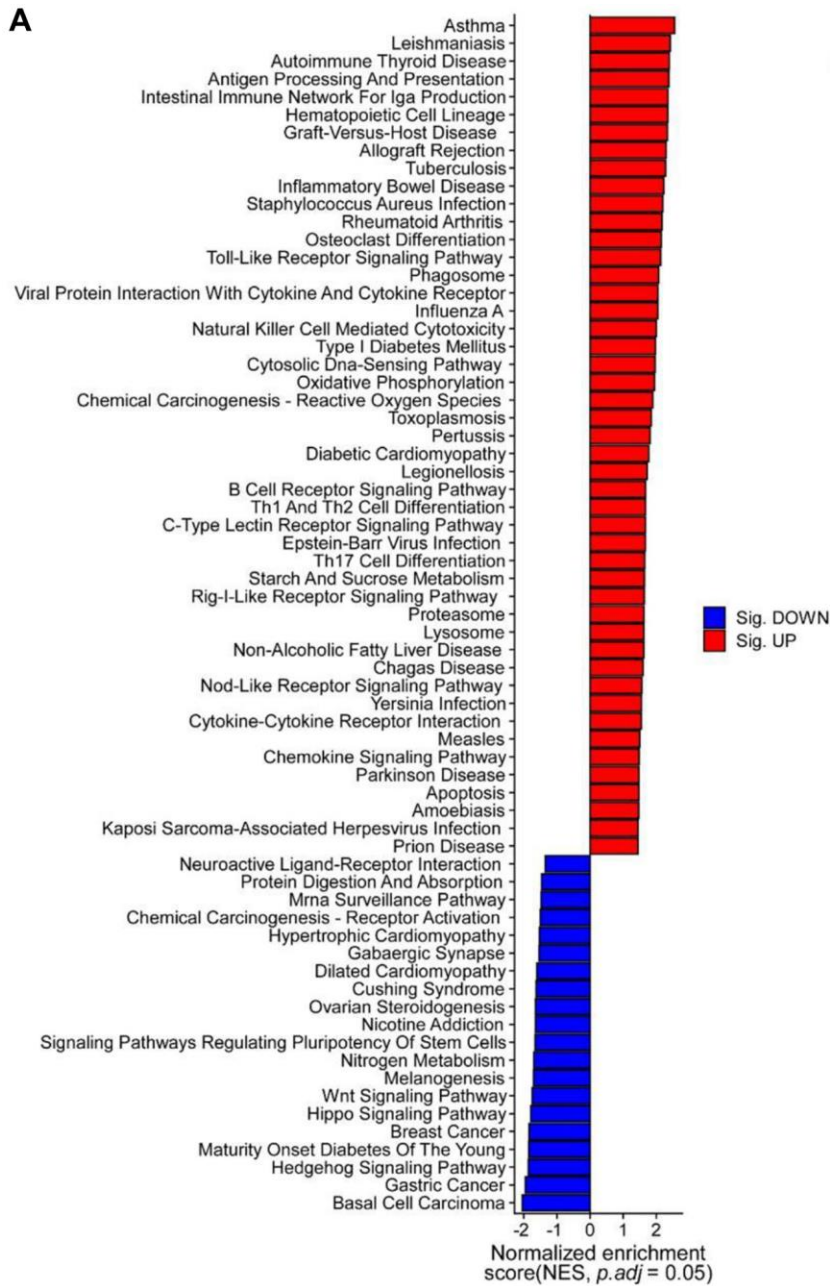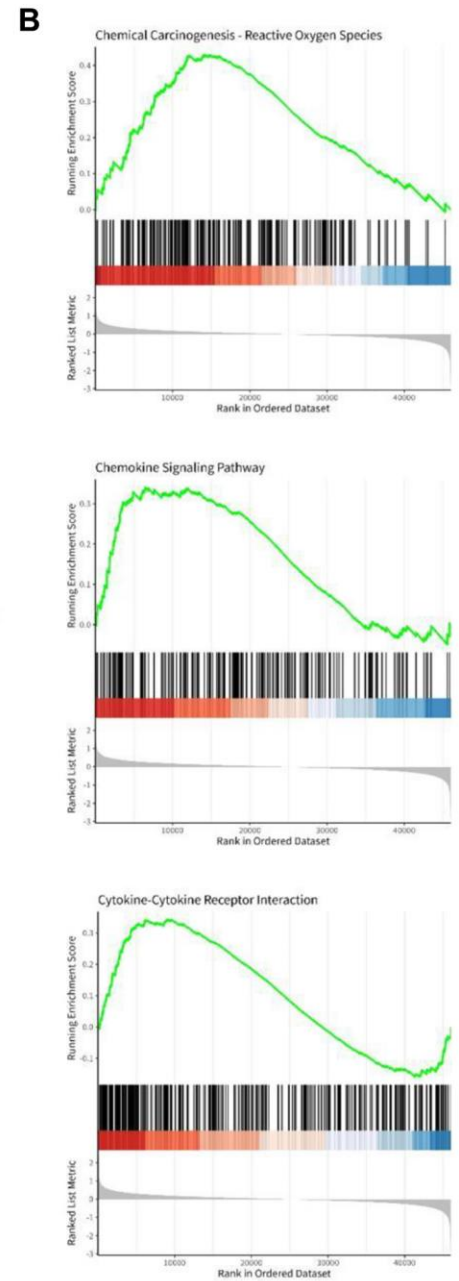

**Supplementary Figure 2. Molecular pathways related to the risk model identified through KEGG and GSEA enrichment analysis. (A) Pathway enrichment analysis using KEGG databases. (B) GSEA analysis revealing enriched pathways in the high-risk group and low-risk group.**
